# Supplementary material for: Deep learning-based morphology classification of activated sludge flocs in wastewater treatment plants
Source: Royal Society of Chemistry journal article supplement (doi:10.1039/d0ew00908c), 2020-12-16
Supplement: d0ew00908c2.xlsx [file d0ew00908c2.xlsx]

## Sheet: Table S1
	Table S1. Physicochemical parameters of AS samples and liquid in aeration tanks of five WWTPs during test period. The physicochemical parameters of the other three WWTPs (N, H, and K) were not available. MLSS: Mixed liquor suspended solids, SV30: The sludge volume occupied by settled sludge after 30 minutes, SVI: Sludge volume index, SS: Suspended solids.
	WWTP	Temperature [℃]		pH [-]		MLSS [mg/L]		SV30 [%]		SVI [mL/g]		BOD in a primary sedimentation tank [mg/L]		SS in a primary sedimentation tank [mg/L]
	S	N.D.		N.D.		1536	2130	22.7	32	147.1	174	ca. 100	Unknown	N.D.
							1090		15		126		Unknown
	M	17.08	18.7	6.616	6.73	2460	2720	54.4	65	222.336	280.172	99.2	125	N.D.
			15.5		6.53		2160		47		191.057		83
	Sh	17.52	20	6.42	6.7	1838	2020	30.4	35	165.6	176	97	100	33.2	41
			15.5		6.2		1590		26		156		93		23
	T	N.D.		N.D.		2487.5	2840	40	42	161.5	179	97	Unknown	44	Unknown
							2180		36		154		Unknown		Unknown
	E	14.7	18.2	6.1	6.5	2602.9	3030	82.8	90	319.4	360.6	150	178	44.9	63
			10.8		5.4		2080		75		291.4		85		28
		Average	Maximum			N.D.: Not determined.
			Minimum
	Typical microscopic images in bright field of AS flocs obtained from six different WWTPs.
